# Supplementary material
Source: publisher site journal article supplement (https://www.spandidos-publications.com/7682/downloadSupplementary)
Supplement: Supplementary file 1 [file downloadSupplementary]

## Sheet: Sheet1
Table SII. Top 30 differentially abundant metabolites between the CP group and the HC group.
Metabolite name	Log2 FC	VIP	P-value
6-Keto-decanoylcarnitine	-1.92382	2.68052	2.67×10-14
Trimethadione	-2.28503	2.67607	7.99×10-15
Salsolinol-1-carboxylic acid	-2.82851	2.64132	4.26×10-14
Histidylproline	-2.25289	2.62242	7.21×10-14
Norethindrone	-7.28313	2.60447	1.97×10-13
Gibberellin A12 aldehyde	-6.94229	2.5908	3.03×10-13
6-isopentenyladenine-9-β-D-glucopyranoside	-3.33905	2.58028	2.34×10-12
Prostaglandin E2	-4.19216	2.57258	2.42×10-13
Yucalexin B5	-5.48527	2.56773	6.11×10-13
5,6-Dihydroxyprostaglandin F1a	-5.87939	2.55971	6.46×10-13
α-Carboxy-δ-nonalactone	-2.02152	2.55267	3.35×10-13
11-Dehydro-thromboxane B2	-3.08354	2.55187	2.51×10-12
6,10a-Dihydroxy-4-(hydroxymethyl)-4,7,11b-trimethyl-1,2,3,4a,5,6,6a,7,11,11a-decahydronaphtho[2,1-][1]benzouran-9-one	-2.99481	2.54789	6.38×10-13
5-(4-carboxy-3-methylbutyl)-5,6,8a-trimethyl-3-oxo-4a,6,7,8-tetrahydro-4H-naphthalene-1-carboxylic acid	-3.51129	2.54265	6.12×10-13
Glutarylcarnitine	-3.68662	2.53714	2.02×10-12
6-Butyltetrahydro-2H-pyran-2-one	-1.98308	2.53259	6.69×10-13
PC(16:0/18:2)	4.21531	2.53157	8.31×10-12
(E)-2-(hydroxymethyl)-3-(3-oxo-5-propan-2-yl-4,5,6,7-tetrahydro-1H-2-benzofuran-4-yl)prop-2-enoic acid	-2.89351	2.50848	6.55×10-12
5-Hydroxyflavone	-3.01092	2.4917	2.11×10-11
Tricaproin	-1.86252	2.47975	9.87×10-12
(S)-(4-Hydroxy-phenyl)-(S)-piperidin-2-yl-acetic acid methyl ester; hydrochloride	-2.93762	2.46538	3.51×10-11
ethyl 2-(2-methylpropanoylamino)benzoate	-2.04375	2.46505	3.87×10-11
Benzyladenine	-1.82841	2.46226	7.18×10-12
Adipoylglycine	-2.17553	2.45656	7.81×10-12
Fenoxycarb	-3.31323	2.42156	3.75×10-11
7-[(2R,3S,4S)-4,6-dihydroxy-2-[(E,3S)-3-hydroxyoct-1-enyl]oxan-3-yl]heptanoic acid	-3.71765	2.41499	8.51×10-11
(Z)-7-[(1R,2R,3R,5S)-2-(1,2-Dihydroxy-3-oxooctyl)-3,5-dihydroxycyclopentyl]hept-5-enoic acid	-3.64816	2.41371	2.28×10-10
7-hydroxy-3-phenyl-8-(piperidylmethyl)chromen-4-one	-1.96489	2.41006	9.56×10-11
15-Deacetylneosolaniol	-2.79913	2.3953	1.89×10-10
2-Methyl-4-oxopentanedioic acid	-2.17344	2.39479	2.72×10-10
CP, colorectal polyp; FC, fold change; HC, healthy control; VIP, variable influence on projection.
